# Supplementary material for: L-leucine increases the sensitivity of drug-resistant Salmonella to sarafloxacin by stimulating central carbon metabolism and increasing intracellular reactive oxygen species level
Source: Front Microbiol. 2023 May 12;14:1186841. doi: 10.3389/fmicb.2023.1186841 (PMC10213264; doi:10.3389/fmicb.2023.1186841)
Supplement: Supplementary file 1 [file Table_1.XLSX]

## Sheet: Supplementary table 1
Supplementary table 1 :Primers for RT-qPCR
	Genes in electron transport chain					Genes in TCA cycle
	Primer	Sequence（5'-3'）	Product（bp）			Primer	Sequence（5'-3'）	Product（bp）
	nuoI-F1	AGTAGGTTTCGGCACTCAGG	125			pckA-F2	AAACACCCGCGTCTCTTACC	165
	nuoI-R1	CGATACGACCACGGTAACGG				pckA-R2	GACAGGAAGTGGTACTGCGT
	ndh-F1	CGTGCTGACGCAAACTATGG	149			mdh-F2	TCGGTCTTTCTCTGGTTCGC	150
	ndh-R1	GGTTCGTTTCCAGACCACCA				mdh-R2	GTGTGCCGATGGATTTACGC
	cyoB-F1	TCGCCTCTTTCCCGATTCTG	128			gltA-F2	GTGAAACCTGCCACGAAGTG	102
	cyoB-R1	CCAGGCCCAAATCAGGTTGA				gltA-R2	TGAAGTACGGGTCGTTGAGC
	atpA-F2	GTTTGCATCCGACCTTGACG	142			acnB-F2	TCTGCCGGATCTGAAAGTCG	140
	atpA-R2	ATAACCACGTTCTGCTGCGA				acnB-R2	TCCACTTCAGCAGGACGATG
	atpC-F1	ATCCAGGTTACGGGTAGCGA	106			icdA-F2	AACAAATCCTGTTGCGTCCG	106
	atpC-R1	GACCGTGCTGCTTAACGATG				icdA-R2	ATACCGATACCGCCAACCTG
	atpD-F1	GGCGGTAAAGTCGGTCTGTT	100			sucA-F2	TATCGAAACCGAAGGCGGTC	136
	atpD-R1	CTGAGTAACCGGAGTGCTCG				sucA-R2	CACTTTGTTGCTGCTCGGTT
	atpG-F1	AGCCGTCCTTATGCAGAGAC	195			sucC-F2	ACCGGCTAACTTCCTTGACG	101
	atpG-R1	CCATGCCTTCATATCCGCCA				sucC-R2	CCAGAACCGCTTTCACGTTG
	atpH-F1	GCCGAGGTAACCAAGAACGA	105			sdhA-F1	ATGGTATGCGCTGGATCTGG	170
	atpH-R1	GTCTAACTGCTCACCGCAGA				sdhA-R1	CGGTGTTGATGTGAGCGTTG
	16S-F1	CTGGAACTGAGACACGGTCC	199			sdhC-F1	TCATGGACGGCTTCATCGTT	145
	16S-R1	GGAGTTAGCCGGTGCTTCTT				sdhC-R1	ATTTTGGCAGAGCGTTGACC
						fumA-F1	TTGTCCGCCGTATCACATCG	109
						fumA-R1	TTCGGTTGGTAGCGCATCAT
						fumC-F1	ACTGTGCGTCAGGAATCGAG	116
						fumC-R1	AATCTCCGCCGCTTTATCGT
						lpd-F1	GGGATTCTACCGACGCTCTG	192
						lpd-R1	TGATGCGCTTGGTGAAGACT
						aceE-F1	GCGTAAAGACACCAGCGGTA	198
						aceE-R1	TTCTTCGGATCGTGACCACC
						aceF-F1	AGGCTTACGTGAAAGACGCT	182
						aceF-R1	CATCACCCAGTTACGGCTCA
						frdC-F1	GGATGGGATTCGTCGGCTT	123
						frdC-R1	TGATATTGGCCGCCTTCGG
						frdB-F1	ACAACATCGCTACTGGACGC	180
						frdB-R1	CGCTTCCACCTTCATACCGT
						frdA-F1	AACATGATGGAAGGCACGCT	184
						frdA-R1	CGGTCGGGTGATACTGAACG

## Sheet: Supplementary table 2 
Supplementary table 2 :453 metabolites
	adduct	Name	m/z	rt(s)
	M+	11(Z),14(Z)-Eicosadienoic Acid	308.274	67.488
	(M+H-H2O)+	1-Aminocyclopropanecarboxylic acid	84.0437	475.477
	(M+H)+	1-Methyladenosine	282.118	246.556
	(M+H)+	1-Palmitoyl-2-hydroxy-sn-glycero-3-phosphoethanolamine	454.29	154.985
	(M+H)+	1-Palmitoyl-2-oleoyl-sn-glycero-3-phosphoethanolamine	718.534	149.08
	(M+H-H2O)+	1-Palmitoylglycerol	313.272	168.24
	(M+H)+	1-Stearoyl-2-hydroxy-sn-glycero-3-phosphocholine	524.368	159.821
	(M+H)+	1-Stearoyl-sn-glycerol 3-phosphocholine	524.368	187.887
	(M+H)+	2(1H)-Pyridinone	96.0435	56.4575
	(M+H-2H2O)+	2-Amino-2-methyl-1,3-propanediol	70.0645	328.491
	(M+H)+	2'-Deoxyadenosine 5'-monophosphate (dAMP)	332.074	416.596
	(M+H)+	2-Hydroxyadenine	152.056	222.685
	(M+CH3COO+2H)+	2-Phenylacetamide	196.096	37.579
	(M+H-H2O)+	2-Phenylbutyric acid	147.08	32.617
	(M+H)+	2-Thiocytidine	260.069	173.882
	(M-H+2K)+	3,4-Dihydroxymandelic acid	260.956	209.554
	(2M+Na)+	3,4-Dihydroxyphenylacetic acid	359.069	358.901
	(M+H)+	3',5'-Cyclic guanosine monophosphate	346.053	321.785
	(M+H)+	3-Aminobutanoic acid	104.07	44.94
	M+	(3-Carboxypropyl)trimethylammonium cation	146.118	370.892
	(M+CH3CN+H)+	3-Hydroxyisovaleric acid	160.094	252.738
	(M+H)+	3-Methoxy-4-Hydroxyphenylglycol Sulfate	265.033	253.275
	(M+CH3CN+Na)+	3'-O-methyladenosine	345.132	198.669
	(M+H)+	3'-Phosphoadenosine 5'-phosphosulfate (PAPS)	508.001	471.41
	(M+H)+	4-Aminobutyric acid	104.07	365.221
	(M+H-H2O)+	4-Guanidinobutyric acid	128.08	179.952
	(M+H)+	4-Hydroxybutanoic acid lactone	87.0434	370.445
	(M+H)+	5,2'-O-dimethylcytidine	272.123	131.105
	(M+H-H2O)+	5-Hydroxymethylcytidine	256.092	396.277
	(M+CH3CN+H)+	5-L-Glutamyl-L-alanine	260.123	411.049
	(M+H)+	5-Methylcytosine	126.065	131.302
	(M+H)+	Acadesine (Drug)	259.105	193.149
	(M+H)+	Acetylcarnitine	204.122	297.541
	(M+CH3CN+Na)+	Acetylcholine	209.127	321.724
	(M+H)+	Acetyl coenzyme A (Acetyl-CoA)	810.13	423.944
	(2M+K)+	Acetyl-DL-Valine	357.151	207.053
	(M+H)+	Adenine	136.061	81.182
	(M+H)+	Adenosine	268.104	168.899
	(M+CH3COO+2H)+	Adenosine 3',5'-cyclic phosphate (cAMP)	390.086	170.791
	(M+H)+	Adenosine 3',5'-diphosphate (PAP)	428.034	490.812
	(M+H)+	Adenosine 5'-diphosphate (ADP)	428.035	469.594
	(M+H)+	Adenosine monophosphate (AMP)	348.07	427.751
	(M+H-2H2O)+	ADP-ribose	524.055	432.305
	(M+H)+	Agmatine	131.128	239.871
	(M+H)+	Agomelatine	244.128	431.937
	(M+NH4)+	Ala-Gln	235.14	467.49
	(M+H)+	Ala-Glu	219.097	455.836
	(M+H-H2O)+	Ala-Leu	185.127	38.7475
	(M+H)+	Ala-Lys	218.149	428.985
	(M+H)+	Arg-Ala	246.155	410.758
	(M-H+2Na)+	Arg-Arg	375.186	374.562
	(M+H-H2O)+	Arg-Cys	260.123	375.875
	(M+H)+	Arg-Gln	303.176	429.49
	(M+H)+	Arg-Glu	304.16	449.161
	(M+K)+	Arg-Ile	326.157	327.976
	(M+H)+	Argininosuccinic acid	291.129	467.262
	(M+H)+	Arg-Lys	303.213	559.53
	(M+K)+	Arg-Phe	360.145	473.41
	(M+H-2H2O)+	Arg-Ser	226.125	110.722
	(M+H)+	Arg-Val	274.186	351.64
	(M+H-H2O)+	Atrolactic acid	149.059	251.706
	(M+CH3CN+H)+	Bestatin	350.206	185.074
	(M+H-H2O)+	.beta.-Cyano-L-alanine	97.0388	48.4565
	(M+H)+	.beta.-Homoproline	130.085	66.1625
	(M+H-H2O)+	beta-Hydroxyisovaleric acid	101.059	166.387
	(M+H)+	Betaine	118.085	378.486
	M+	beta-Nicotinamide D-ribonucleotide	335.063	462.284
	(M+NH4)+	Cellobiose	360.148	393.916
	(M+H)+	Citramalic acid	149.045	183.968
	(M+H)+	Coenzyme A (CoA)	768.119	435.111
	(M+H)+	Creatinine	114.066	167.032
	(M+CH3COO+2H)+	Cyclohexylamine	160.133	378.486
	(M+H-H2O)+	Cyclopentolate	274.175	232.952
	(M+H)+	Cytidine	244.096	180.286
	(M+H)+	Cytidine 5'-monophosphate	324.058	456.406
	(2M+Na)+	Cytidine 5'-monophosphate (CMP)	669.103	490.064
	(M+H)+	Cytosine	112.05	191.71
	(M+CH3CN+H)+	d-Dethiobiotin	256.166	300.717
	(M+H)+	Deoxyadenosine	252.108	140.085
	(M+H)+	Dephosphocoenzyme A (Dephospho-CoA)	688.152	349.903
	(M+H-2H2O)+	Diethanolamine	70.0646	256.589
	(M+H)+	Dihydrouracil	115.049	61.458
	(M+H)+	Dimethylaminopurine	164.092	64.899
	(M+NH4)+	DL-a-Hydroxybutyric acid	122.08	245.106
	(M+CH3CN+H)+	DL-Norvaline	159.112	250.187
	(M+CH3CN+Na)+	DL-O-tyrosine	245.093	179.718
	(M+CH3CN+H)+	DL-Phenylalanine	207.112	227.382
	(M+H-H2O)+	Dopamine	136.075	295.137
	(M+H-H2O)+	D-Ornithine	115.086	197.119
	(M+H)+	D-Proline	116.069	318.14
	(M+H)+	EDTA	293.097	455.829
	(M+H)+	Enterostatin human	497.28	450.086
	(M+H)+	epsilon-Caprolactam	114.09	42.107
	(M+H)+	Ergothioneine	230.095	321.283
	(M+H)+	Erucamide	338.34	32.98
	(M+H)+	Flavin adenine dinucleotide (FAD)	786.161	396.084
	(M+H)+	Flavin mononucleotide (FMN)	457.109	405.834
	(M+CH3CN+H)+	Flumequine	303.11	252.506
	(M+H-H2O)+	gamma-Glutamyl-L-methionine	261.089	224.708
	(M+H)+	.gamma.-L-Glu-.epsilon.-L-Lys	276.154	455.356
	(M+H)+	gamma-L-Glutamyl-L-glutamic acid	277.102	456.484
	(M+H-H2O)+	gamma-L-Glutamyl-L-phenylalanine	277.117	206.517
	(M+H-H2O)+	gamma-L-Glutamyl-L-valine	229.117	232.545
	(M+H-H2O)+	Glu-Lys	258.144	398.668
	(M+CH3CN+H)+	Glu-Pro	286.14	278.744
	(M+H)+	Glutaraldehyde	101.059	378.413
	(M+H)+	Glutathione	308.09	429.29
	(M+H)+	Glutathione disulfide	613.157	493.676
	(M+H-H2O)+	Glycerol 1-myristate	285.241	195.008
	(M+NH4)+	Glycogen	684.249	320.724
	(M+H)+	Gly-Glu	205.082	421.684
	(M+H-H2O)+	Gly-His	195.087	218.348
	(M+H)+	Gly-Lys	204.133	444.683
	(M+H)+	Gly-Phe	223.107	193.766
	(M+H)+	Guanosine	284.098	257.254
	(M+H)+	Guanosine 5'-monophosphate (GMP)	364.064	461.408
	(M+H-H2O)+	His-Ala	209.102	196.202
	(M+H-H2O)+	His-Gln	266.124	275.774
	(M+H)+	His-Glu	285.118	413.567
	(M+H)+	His-Ile	269.16	292.234
	(M+H-H2O)+	His-Met	269.105	145.508
	(M+H-H2O)+	His-Phe	285.133	146.7
	(M+H-H2O)+	His-Pro	235.119	127.795
	(M+H-H2O)+	His-Ser	225.097	245.076
	(M+H)+	Histamine	112.086	365.679
	(M+H-H2O)+	His-Tyr	301.128	187.724
	(M+H-H2O)+	His-Val	237.134	148.869
	(M+H)+	Hypoxanthine	137.045	239.702
	(M+H)+	Ile-Ala	203.138	374.668
	(M+H)+	Ile-Glu	261.143	360.069
	(M+H)+	Ile-Leu	245.185	188.004
	(M+H)+	Ile-Met	263.14	191.228
	(M+H-H2O)+	Ile-Phe	261.154	452.736
	(M+H)+	Ile-Pro	229.154	242.335
	(M+NH4)+	Indole	135.091	224.975
	(M+H-H2O)+	Indoleacetic acid	158.059	41.067
	(M+H)+	Inosine	269.087	212.029
	(M+H)+	Isopentenyladenosine	336.165	43.4515
	(2M+Na)+	L-Alanine	201.086	412.275
	(M+H)+	L-.alpha.-Amino-.gamma.-butyrolactone	102.054	85.0845
	(M+H)+	L-Anserine	241.129	407.745
	(M+H)+	L-Arginine	175.119	555.902
	(M+H)+	L-Carnitine	162.112	348.339
	(M+H)+	L-Carnosine	227.113	414.026
	(M+H)+	L-Citrulline	176.102	385.543
	(M+H)+	Leu-Trp	318.18	186.188
	(M+H)+	Leu-Tyr	295.164	198.027
	(M+H)+	Leu-Val	231.169	195.589
	(M+H)+	L-Fucose-1-phosphate	245.041	447.207
	(M+H)+	L-Glutamate	148.06	412.322
	(M+Na)+	L-Glutamine	169.06	195.657
	(M+H)+	L-Histidine	156.076	394.848
	(2M+H)+	Linoleic acid	561.485	149.583
	(M+H-2H2O)+	Lisinopril	370.218	532.572
	(M+H)+	L-Leucine	132.101	194.668
	(M+H-H2O)+	L-Lysine	129.101	213.437
	(M+H)+	L-Methionine	150.057	278.079
	(M+H)+	L-NG-Monomethylarginine	189.134	270.657
	(M+CH3CN+H)+	L-Norleucine	173.128	245.775
	(M+H)+	L-Phenylalanine	166.086	251.589
	(M+H)+	L-Proline	116.07	520.845
	(M+NH4)+	L-Pyroglutamic acid	147.075	366.524
	(M+H)+	L-Saccharopine	277.138	451.813
	(M+H)+	L-Tryptophan	205.096	252.842
	(M+H)+	L-Tyrosine	182.08	295.103
	(M+H)+	Lumichrome	243.087	42.964
	(M+H-H2O)+	Lys-Asp	244.128	511.207
	(M+H)+	Lys-Ile	260.196	349.678
	(M+H)+	Lys-Leu	260.195	272.954
	(M+H)+	Lys-Thr	248.159	427.25
	(M+H)+	Lys-Val	246.18	390.815
	(M+H)+	Methoprene (S)	311.257	37.347
	(M+H)+	Methylguanidine	74.0707	255.149
	(M+H)+	N1-Acetylspermidine	188.176	286.896
	(M+H)+	N1,N12-Diacetylspermine	287.243	362.62
	(M+H)+	N6-Methyl-L-lysine	161.128	360.114
	(M+H)+	N6,N6,N6-Trimethyl-L-lysine	189.159	521.49
	(M+H)+	N8-Acetylspermidine	188.176	536.057
	(M+H)+	N-Acetylcadaverine	145.133	294.543
	(M+H-H2O)+	N-Acetyl-D-glucosamine	204.086	328.922
	(M+H-H2O)+	N-Acetyl-L-alanine	114.054	245.289
	(M+H-H2O)+	N-Acetylmannosamine	204.086	247.412
	(M+H)+	N-Acetylputrescine	131.117	318.095
	(M+H)+	N-.alpha.-Acetyl-L-arginine	217.129	362.978
	(M+CH3CN+H)+	N-Formylmethionine	219.084	359.401
	(M+H)+	Nicotinamide	123.054	461.696
	(M+H)+	Nicotinamide adenine dinucleotide (NAD)	664.113	432.178
	(M+H)+	Nicotinamide adenine dinucleotide phosphate (NADP)	744.08	492.216
	(M+H)+	Nicotinamide ribotide	335.062	506.646
	(M+H)+	Nicotinate	124.039	214.658
	(M+H)+	Nicotinate D-ribonucleotide	336.048	463.53
	(M+H-H2O)+	Nitrobenzene	106.028	57.3265
	(M+NH4)+	N-Methylhydantoin	132.08	252.585
	(M+CH3CN+H)+	N-(omega)-Hydroxyarginine	232.139	431.743
	(M+H-2H2O)+	Norepinephrine	134.062	39.5645
	(M+H)+	Norharmane	169.075	37.5385
	(M+Na)+	Ornithine	155.08	177.659
	(M+CH3COO+2H)+	Oxyphencyclimine	405.232	448.536
	(M+H)+	Pantetheine	279.136	43.299
	(M+H)+	Pantothenate	220.117	271.16
	(M+H-H2O)+	Phe-Gln	276.133	132.118
	(M+H-H2O)+	Phenylacetic acid	119.048	33.6335
	(M+H)+	Phenylethylamine	122.095	161.723
	(M+H-2H2O)+	Phenyllactic acid	131.048	251.73
	(M+H-H2O)+	Phe-Ser	235.107	78.7215
	(M+H)+	Phe-Thr	267.132	194.923
	(M+H)+	Phosphorylcholine	184.072	474.385
	(M+H)+	Pro-Ala	187.107	329.572
	(M+H)+	Pro-Arg	272.171	441.74
	(M+NH4)+	Pro-Asn	247.139	453.394
	(M+H)+	Pro-Asp	231.096	424.208
	(M+H)+	Pro-Gln	244.128	360.159
	(M+H)+	Pro-Glu	245.112	412.771
	(M+H)+	Pro-Gly	173.091	412.505
	M+	Pro-Met	246.107	361.417
	(M+H)+	Pro-Phe	263.138	228.493
	(M+H)+	Pro-Thr	217.117	324.847
	M+	Pro-Trp	301.149	379.204
	(M+H)+	Pro-Val	215.138	284.743
	(M+H)+	Putrescine	89.1066	328.503
	(M+H)+	Pyridoxal (Vitamin B6)	168.065	91.671
	(M+H)+	Pyrrolidine	72.0801	440.747
	(M+CH3COO+2H)+	Pyruvaldehyde	133.048	357.738
	(M+H)+	Riboflavin	377.144	208.868
	(M+H-H2O)+	(-)-Riboflavin	359.133	102.038
	(M+H)+	RU-0211	391.222	177.506
	(M+H)+	S-Adenosylmethionine	399.143	510.435
	(M+H-H2O)+	Ser-Ala	159.075	131.477
	(M+H)+	Ser-Glu	235.091	417.033
	(M+H)+	Ser-Ile	219.133	271.158
	(M+H)+	Ser-Val	205.117	293.138
	(M+H)+	S-Methyl-5'-thioadenosine	298.097	96.774
	(M+H)+	sn-Glycerol 3-phosphoethanolamine	216.062	387.283
	(M+H)+	Spermidine	146.164	239.605
	(M+H)+	Streptonigrin	507.155	398.63
	(M+CH3CN+Na)+	Synephrine	231.113	206.552
	M+	Thiamine	265.111	348.24
	(M+H)+	Thiamine monophosphate	345.076	490.291
	M+	Thiamine pyrophosphate (TPP)	425.042	494.76
	(M+H)+	Thr-Glu	249.107	403.106
	(M+H)+	Triethanolamine	150.111	145.874
	M+	Trigonelline	138.054	281.161
	(M+H)+	Trimethoprim	291.144	40.169
	M+	Trp-Arg	360.197	448.166
	(M+CH3CN+H)+	Tyr-Ala	294.144	195.887
	(M+H)+	Tyramine	138.09	222.362
	(M-2H+3K)+	Tyr-Arg	452.042	428.188
	(M+NH4)+	Tyr-Asp	314.136	294.994
	(M+H-H2O)+	Tyr-Gln	292.128	184.48
	M+	Tyr-Met	312.11	170.155
	(M+H-H2O)+	Tyr-Phe	311.132	292.019
	(M+H-2H2O)+	Tyr-Thr	247.11	360.024
	(M+H)+	Uracil	113.034	80.728
	(M+NH4)+	Uridine 5'-diphosphate (UDP)	422.034	476.871
	(M+H)+	Uridine 5'-monophosphate (UMP)	325.042	439.243
	(M+H)+	Urocanic acid	139.049	287.26
	(M+H)+	Val-Ala	189.122	387.635
	(M+H)+	Val-Asp	233.112	390.094
	(M+H)+	Val-Glu	247.128	380.702
	(M+H)+	Val-Met	249.125	197.509
	(M+H)+	Val-Trp	304.164	193.725
	(M+H)+	Val-Val	217.154	208.313
	(M-H)-	1,2-Benzenedicarboxylic acid	165.019	249.203
	(M+CH3COO)-	1-Deoxy-D-xylulose 5-phosphate	273.036	509.495
	(M-H)-	1-Methyladenosine	280.104	246.92
	(M-H)-	1-Oleoyl-L-.alpha.-lysophosphatidic acid	435.249	241.762
	(M-H)-	1-Palmitoyl-2-hydroxy-sn-glycero-3-phosphoethanolamine	452.275	612.068
	(M-H)-	1-Palmitoyl-2-linoleoyl-sn-glycero-3-phosphate	671.462	35.0045
	(M-H)-	1-Palmitoyl-2-oleoyl-phosphatidylglycerol	747.514	612.095
	(M-H)-	1-Palmitoyl-2-oleoyl-sn-glycero-3-phosphate	673.478	35.317
	(M-H)-	1-Palmitoyl Lysophosphatidic Acid	409.232	175.619
	(M-H)-	20-HETE	319.229	31.231
	(M-H)-	2,3-Dihydroxybenzoic acid	153.019	56.285
	(M+CH3COO)-	2-C-Methyl-D-erythritol 2,4-cyclodiphosphate	337.005	468.911
	(M+CH3COO)-	2-Dehydro-3-deoxy-D-gluconate	237.06	362.13
	(M-H)-	2'-Deoxycytidine diphosphate (dCDP)	386.013	475.502
	(M-H)-	2'-Deoxyuridine	227.066	117.542
	(M-H)-	2-hydroxy-butanoic acid	103.04	269.225
	(M-H2O-H)-	2-keto-D-Gluconic acid	175.024	370.068
	(M-H)-	2-Methyl-3-hydroxybutyric acid	117.055	144.941
	(M-H2O-H)-	2-Oxoadipic acid	141.017	336.913
	(M-H)-	2-Thiocytidine	258.054	171.835
	(M-H)-	3',5'-Cyclic guanosine monophosphate	344.038	321.723
	(M-H)-	3-Dehydroshikimic acid	171.029	287.629
	(M-H)-	3-Hydorxy-3-methylglutaric acid	161.045	371.402
	(M-H)-	3-Hydroxycapric acid	187.133	116.278
	(M-H)-	3-Hydroxydodecanoic acid	215.164	105.145
	(M-H2O-H)-	3-Hydroxyisovaleric acid	99.0445	440.279
	(M-H)-	3'-O-methylguanosine	296.098	193.341
	(M+NH4-2H)-	4-Hydroxybenzoate	154.05	361.31
	(M-H)-	(4Z,7Z,10Z,13Z,16Z,19Z)-4,7,10,13,1 6,19-Docosahexaenoic acid	327.231	18.3575
	(M-H2O-H)-	5-Hydroxyindoleacetate	172.04	40.667
	(M-H2O-H)-	5-L-Glutamyl-L-alanine	199.072	412.019
	(M-H)-	5-Methyltetrahydrofolate (5-Methyl-THF)	458.187	419.227
	(M-H)-	5'-O-methylthymidine	255.098	306.65
	(M+Na-2H)-	5(S),14(R)-Lipoxin B4	373.206	264.065
	(M+CH3COO)-	5(S)-HpETE	395.236	302.082
	(M-H)-	Acamprosate	180.032	35.068
	(M-H)-	Acetyl coenzyme A (Acetyl-CoA)	808.116	423.774
	(M-H)-	Acetyl-DL-Valine	158.082	192.879
	(M-H)-	Acetyl phosphate	138.98	454.625
	(M-H)-	Adenine	134.047	346.982
	(M+CH3COO)-	Adenosine	326.108	162.668
	(M-H)-	Adenosine 3',5'-cyclic phosphate (cAMP)	328.043	283.857
	(M-H)-	Adenosine 5'-diphosphate (ADP)	426.019	466.144
	(M-H)-	Adenosine monophosphate (AMP)	346.054	427.089
	(M-H)-	Adenylsuccinic acid	462.064	493.108
	(M-H2O-H)-	ADP	408.008	472.246
	M-	Allantoin	158.045	419.135
	(M-H2O-H)-	alpha-D-Galactose 1-phosphate	241.011	509.563
	(M-H)-	alpha-D-Glucose 1-phosphate	259.021	455.01
	(M-H)-	alpha-ketoisovaleric acid	115.039	126.139
	M-	Ammelide	128.035	394.63
	(M-H)-	Amobarbital	225.123	153.273
	(M-H)-	Arachidic acid	311.294	38.176
	(M-H)-	cAMP	328.042	264.974
	(M-H)-	Chenodeoxycholate	391.283	148.793
	(M-H)-	cis-9-Palmitoleic acid	253.217	38.397
	(M-H)-	cis-Aconitate	173.01	440.901
	(M-H)-	Citrate	191.019	498.82
	(M-H)-	Coenzyme A (CoA)	766.105	457.202
	(M-H)-	Creatinine	112.051	161.356
	(M-H)-	Cyanuric acid	128.01	136.389
	(M-H)-	Cyclic adenosine diphosphate ribose	540.05	432.178
	M-	Cytidine 5'-diphosphate (CDP)	403.02	454.851
	(M-H)-	Cytidine 5'-monophosphate (CMP)	322.043	456.159
	(M-H)-	D-Aspartic acid	132.03	458.686
	(M+Na-2H)-	Deoxyadenosine monophosphate	352.043	460.42
	(M-H)-	Deoxyguanosine triphosphate (dGTP)	505.985	496.442
	(M-H)-	Deoxyinosine	251.077	176.178
	(M-H)-	Deoxythymidine 5'-diphosphate (dTDP)	401.013	454.654
	(M-H)-	Deoxythymidine 5'-phosphate (dTMP)	321.047	409.438
	(M-H)-	Deoxythymidine triphosphate (dTTP)	480.977	489.517
	(M+CH3COO)-	D-Erythrose 4-phosphate	259.021	473.495
	(M-H)-	D-galacturonic acid	193.034	347.748
	(M+K-2H)-	Dihydrothymine	165.005	285.75
	(M+CH3COO)-	Dihydroxyacetone phosphate	229.011	437.923
	(M-H2O-H)-	Dimethylallyl pyrophosphate	226.983	399.188
	(M-H)-	Dioscin	867.453	425.036
	(M-H)-	DL-2-Phosphoglycerate	184.985	465.601
	(M-H)-	DL-3-Phenyllactic acid	165.055	120.537
	(M-H)-	DL-lactate	89.0242	224
	(M-H)-	D-Lyxose	149.045	150.28
	(M-H2O-H)-	D-Mannose	161.045	348.011
	(M+CH3COO)-	D-Quinovose	223.081	244.296
	(M+CH3COO)-	D-Ribose 5-phosphate	289.032	462.222
	(M+CH3COO)-	D-Ribulose 5-phosphate	289.031	478.663
	(M-H)-	Echinacoside	785.26	478.34
	(M-H)-	EDTA	291.082	453.372
	(M+Na-2H)-	Farnesyl pyrophosphate	403.097	481.475
	(M-H)-	Flavin mononucleotide (FMN)	455.094	405.618
	(M+K-2H)-	Fosfomycin	174.953	399.557
	(M+CH3COO)-	Galactinol	401.128	393.243
	(M-H)-	Gamma-Glutamylcysteine	249.06	346.403
	(M-H)-	gamma-L-Glutamyl-L-glutamic acid	275.087	455.312
	(M-H)-	gamma-L-Glutamyl-L-valine	245.113	374.755
	(M-H)-	Glutathione	306.075	397.894
	(M-H)-	Glutathione disulfide	611.143	493.064
	(M-H2O-H)-	Glutathione, oxidized	593.132	493.173
	(M-H)-	Glyceric acid	105.019	298.314
	(M-H)-	Glycerol 3-phosphate	171.006	430.479
	(M-H)-	Glycyl-L-leucine	187.108	258.775
	(M-H)-	Guanosine	282.083	257.492
	(M-H)-	Homocitrate	205.034	475.61
	(M-H)-	Hydroxyisocaproic acid	131.071	128.102
	(M-H)-	Hydroxyphenyllactic acid	181.05	194.179
	(M-H)-	Hypoxanthine	135.032	166.421
	(M-H)-	Indoxyl sulfate	212.002	3.698
	(M-H)-	Inosine	267.074	305.522
	(M-H)-	Inosine 5'-monophosphate (IMP)	347.038	445.201
	(M-H)-	L-Anserine	239.114	407.489
	(M+Na-2H)-	L-Asparagine	153.03	159.179
	(M-H)-	L-Aspartate	132.03	439.382
	(M-H)-	L-Carnosine	225.099	414.614
	(M-H)-	L-Citrulline	174.088	385.668
	(M-H)-	L-Fucose-1-phosphate	243.027	370.874
	(M-H)-	L-Glutamate	146.046	394.736
	(M-H)-	L-Glutamine	145.061	369.423
	(M-H)-	L-Histidine	154.061	389.009
	(M-H)-	Linoleic acid	279.231	37.537
	(M-H)-	L-Leucine	130.087	258.091
	(M-H)-	L-Malic acid	133.014	405.318
	(M-H)-	L-Methionine	148.043	302.87
	(M-H)-	L-Phenylalanine	164.072	252.51
	(M-H)-	L-Proline	114.056	305.216
	(M-H)-	L-Pyroglutamic acid	128.034	195.175
	(M-H)-	L-Saccharopine	275.123	447.633
	(M-H)-	L-Threonate	135.029	318.628
	(M-H)-	L-Tryptophan	203.082	253.493
	(M-H)-	L-Tyrosine	180.066	295.277
	(M-H)-	Lumichrome	241.072	179.542
	(M+NH4-2H)-	Maleic acid	132.03	402.408
	(M-H)-	Manumycin A	549.249	373.433
	(2M-H)-	Mevalonic acid	295.138	115.551
	(M-H)-	myo-Inositol	179.055	385.496
	(M-H)-	Myristic acid	227.201	38.126
	(M-H)-	Myristoleic acid	225.185	38.217
	(M-H2O-H)-	N-Acetyl-D-glucosamine	202.071	296.252
	(M-H2O-H)-	N-Acetyl-D-Glucosamine 6-Phosphate	282.037	449.49
	(M-H)-	N-Acetyl-DL-methionine	190.053	196.624
	(M-H)-	N-Acetyl-D-phenylalanine	206.081	165.64
	(M-H)-	N-Acetylglucosamine 1-phosphate	300.047	444.389
	(M-H)-	N-Acetyl-L-alanine	130.05	250.788
	(M-H)-	N-Acetyl-L-aspartic acid	174.04	393.043
	(M-H)-	N-Acetyl-L-glutamate	188.055	386.325
	(M-H)-	N-Acetyl-L-Histidine	196.072	312.149
	(M-H)-	N-Acetylneuraminic acid	308.097	420.833
	(M-H)-	N-.alpha.-Acetyl-L-arginine	215.114	363.087
	(M-H)-	N-Formylmethionine	176.038	195.823
	(M-H)-	Nicotinamide	121.04	69.391
	(M-H)-	Nicotinamide adenine dinucleotide (NAD)	662.096	430.873
	(M-H)-	Nicotinamide adenine dinucleotide phosphate (NADP)	742.065	491.594
	(M-H)-	Nicotinamide ribotide	333.057	464.334
	(M-H)-	Nicotinate	122.022	345.774
	(M-H)-	Nicotinate D-ribonucleotide	334.031	463.498
	(M-H)-	Nodularin	823.425	445.514
	(M-H)-	Norethindrone Acetate	339.198	26.9375
	(M-H)-	Oleic acid	281.247	83.641
	(M+CH3COO)-	O-Phospho-L-threonine	258.037	469.07
	M-	O-Phosphotyrosine	261.037	460.303
	M-	Oxazepam	286.049	196.045
	(M-H)-	Palmitic acid	255.233	38.424
	(M-H)-	Pantetheine	277.122	45.196
	(M-H)-	Pantothenate	218.103	267.05
	M-	Pentobarbital	226.127	60.6175
	(M+CH3COO)-	Phosphocreatine	270.048	353.298
	(M-H2O-H)-	Phosphoenolpyruvate	148.964	460.942
	(M-H)-	Protoporphyrin IX	561.247	184.425
	(M-H)-	Pseudouridine	243.061	237.372
	(M-H)-	Pyridoxal (Vitamin B6)	166.05	102.388
	(M-H2O-H)-	Ribitol	133.05	199.136
	(M-H)-	Ribothymidine	257.077	143.068
	(M-H)-	Rutin	609.153	321.722
	(M-H)-	S-Methyl-5'-thioadenosine	296.081	81.832
	(M-H)-	sn-Glycerol 3-phosphoethanolamine	214.048	386.878
	(M+Na-2H)-	S-Nitroso-L-glutathione	357.043	328.656
	(M-H)-	Stearic acid	283.263	8.747
	(M-H)-	Succinate	117.02	386.42
	(M-H)-	Sucrose	341.107	393.543
	(M+CH3COO)-	Sulfamethoxypyridazine	339.085	217.147
	(M-H)-	Taurine	124.007	290.057
	(M-H)-	Taurocholate	514.296	398.953
	(M-H)-	Thymine	125.035	79.725
	(M-H)-	UDP-N-acetylglucosamine	606.071	430.295
	(M-H)-	Uracil	111.02	93.719
	(M-H)-	Uridine 5'-diphosphate (UDP)	402.993	476.315
	(M-H)-	Uridine 5'-diphosphoglucuronic acid (UDP-D-glucuronate)	579.024	479.39
	(M-H)-	Uridine 5'-monophosphate (UMP)	323.027	438.781
	(M-H)-	Uridine diphosphate glucose(UDP-D-Glucose)	565.044	444.323
	(M-H)-	Valeric acid	101.06	101.328
	(M-H)-	Xanthine	151.025	310.784
	(M-H)-	Xanthosine	283.067	214.993
	(M-H)-	Xanthylic acid (XMP)	363.032	478.013

## Sheet: Supplementary table 3
Supplementary table 3:Differential metabolites identified in SAR-R and SAR-S
	Name	VIP	Fold change	p-value	m/z	rt(s)
	Allantoin	1.5495	3.48499	1.50982e-08	158.045	419.135
	Glyceric acid	1.51663	2.8596	0.0366857	105.019	298.314
	Phosphoenolpyruvate	2.75589	2.4763	0.019959	148.964	460.942
	Argininosuccinic acid	3.25724	1.68782	0.00117318	291.129	467.262
	cis-9-Palmitoleic acid	13.0553	1.62998	0.0227049	253.217	38.397
	Dimethylaminopurine	4.47192	1.50729	0.0302125	164.092	64.899
	Arachidic acid	1.02212	1.49902	0.0312732	311.294	38.176
	N-Acetylputrescine	4.01639	1.45821	9.00001e-06	131.117	318.095
	N-Acetylcadaverine	4.01639	1.45821	9.00001e-06	131.117	318.095
	5-Methylcytosine	1.01123	1.44887	0.000292479	126.065	131.302
	Betaine	1.26327	1.42738	0.000117996	118.085	378.486
	2-Thiocytidine	1.02949	1.42207	0.0116911	258.054	171.835
	2,3-Dihydroxybenzoic acid	1.42993	1.31319	0.00393511	153.019	56.285
	L-Alanine	1.75978	1.26126	0.00126615	201.086	412.275
	2-Oxoadipic acid	6.6285	0.860217	0.0115403	141.017	336.913
	L-Carnosine	1.29713	0.775309	0.00394878	227.113	414.026
	.beta.-Homoproline	1.86988	0.75051	0.00372716	130.085	66.1625
	L-Citrulline	1.39048	0.744474	0.00350708	176.102	385.543
	2-Phenylbutyric acid	3.27525	0.727428	0.00241901	147.08	32.617
	L-Tryptophan	1.04416	0.706064	0.031852	203.082	253.493
	Hypoxanthine	1.09815	0.704964	0.0441654	137.045	239.702
	N-.alpha.-Acetyl-L-arginine	1.87242	0.702325	0.00063681	217.129	362.978
	D-Proline	1.07299	0.68029	0.000343437	116.069	318.14
	L-Saccharopine	1.02759	0.67845	0.0181655	277.138	451.813
	Homocitrate	1.44479	0.677504	0.0106578	205.034	475.61
	Adenosine 5'-diphosphate	2.78209	0.669582	0.0205707	426.019	466.144
	Cyclohexylamine	12.2758	0.655569	7.73012e-07	160.133	378.486
	L-Anserine	1.58789	0.655349	0.000531645	239.114	407.489
	Nicotinate D-ribonucleotide	7.2239	0.653609	0.0446678	336.048	463.53
	Thymine	2.81799	0.624606	6.86251e-05	125.035	79.725
	Ammelide	1.8493	0.621304	0.00697071	128.035	394.63
	D-Ornithine	1.83333	0.610115	0.00627718	115.086	197.119
	L-Glutamate	3.31173	0.595631	0.00606401	146.046	394.736
	Pantothenate	6.27634	0.59391	0.00198061	218.103	267.05
	Adenosine monophosphate	3.18343	0.57461	0.00444479	346.054	427.089
	Pantetheine	3.5001	0.57248	0.0269326	279.136	43.299
	alpha-D-Glucose 1-phosphate	1.71273	0.559881	0.000866893	259.021	455.01
	3'-O-methylguanosine	1.3124	0.550523	0.00859824	296.098	193.341
	Acetyl coenzyme A	1.53072	0.539232	0.00197267	810.13	423.944
	Deoxythymidine 5'-diphosphate	1.76909	0.528972	0.0199352	401.013	454.654
	5-Hydroxymethylcytidine	1.71209	0.521763	5.54278e-07	256.092	396.277
	L-Glutamine	1.36898	0.513261	0.0214072	169.06	195.657
	Succinate	4.65484	0.507142	0.0255182	117.02	386.42
	Glycerol 3-phosphate	1.03341	0.490104	0.0149348	171.006	430.479
	Nicotinamide adenine dinucleotide	1.49428	0.485473	5.0645e-05	664.113	432.178
	Maleic acid	1.59786	0.475756	1.86311e-05	132.03	402.408
	L-Malic acid	5.71119	0.470787	0.00403663	133.014	405.318
	Cyclic adenosine diphosphate ribose	1.24974	0.465609	0.001039	540.05	432.178
	beta-Hydroxyisovaleric acid	1.98119	0.446294	0.000698781	101.059	166.387
	N-Acetyl-L-aspartic acid	1.52741	0.436804	2.5745e-05	174.04	393.043
	Glutathione disulfide	3.80843	0.434826	0.000449494	613.157	493.676
	N-Acetyl-D-Glucosamine 6-Phosphate	1.22817	0.422923	2.24867e-05	282.037	449.49
	Citrate	5.05234	0.42107	0.00786338	191.019	498.82
	1-Palmitoyl-2-oleoyl-sn-glycero-3-phosphate	2.94435	0.41486	0.0180412	673.478	35.317
	Uridine 5'-monophosphate	3.21634	0.41203	0.000677367	323.027	438.781
	L-Threonate	1.68943	0.406333	0.000446217	135.029	318.628
	sn-Glycerol 3-phosphoethanolamine	2.87927	0.385395	0.00256556	214.048	386.878
	D-Mannose	1.2841	0.373203	7.85689e-06	161.045	348.011
	2-hydroxy-butanoic acid	1.19318	0.303061	7.20497e-05	103.04	269.225
	O-Phosphotyrosine	1.22939	0.301278	0.00219163	261.037	460.303
	Ergothioneine	3.94583	0.263507	7.91727e-09	230.095	321.283
	Glutathione	4.33227	0.221943	0.00234925	306.075	397.894
